# Supplementary material for: Potential application of green extracts rich in phenolics for innovative functional foods: natural deep eutectic solvents as media for isolation of biocompounds from berries
Source: Royal Society of Chemistry journal article supplement (doi:10.1039/d3fo05292c), 2024-01-01
Supplement: d3fo05292c1.pdf [file d3fo05292c1.pdf]

1 Potential application of green extracts rich in phenolics for innovative  
2 functional foods: Natural deep eutectic solvents as medium for isolation  
3 of biocompounds from berries

4  
5 Mila Č. Lazović<sup>1</sup>, Marko D. Jović<sup>1</sup>, Marija Petrović<sup>2</sup>, Ivica Z. Dimkić<sup>2</sup>, Uroš M. Gašić<sup>3</sup>, Dušanka  
6 M. Milojković Opsenica<sup>4</sup>, Petar M. Ristivojević<sup>4</sup>, Jelena Đ. Trifković<sup>4</sup>

7  
8 <sup>1</sup> Innovation Centre of Faculty of Chemistry Ltd., Studentski trg 12-16, 11158 Belgrade, Serbia

9 <sup>2</sup> University of Belgrade – Faculty of Biology, Studentski trg 16, 11158 Belgrade, Serbia

10 <sup>3</sup> University of Belgrade – Institute for Biological Research "Siniša Stanković" National Institute  
11 of Republic of Serbia, Bulevar despota Stefana 142, 11060, Belgrade, Serbia

12 <sup>4</sup> University of Belgrade – Faculty of Chemistry, Studentski trg 12-16, 11158 Belgrade, Serbia

13

14

## 15 **Supplementary data**

16 List of tables and figures:

17 Table S1. Composition of HBD and HBA that didn't form a eutectic system or formed liquids were  
18 too viscous to use for extractions.

19 Table S2. Optimization of mobile phase for phenolic profile of various berry fruits. Table S2.  
20 Optimization of mobile phase for phenolic profile of various berry fruits.

21 Table S3. Optimization of mobile phase for metabolic profile of various berry fruits. Table S3.  
22 Optimization of mobile phase for metabolic profile of various berry fruits.

23 Figure S1. HPTLC profiles of methanolic extracts and phenolic standards. Abbreviations: A-  
24 chokeberry K1, B- blueberry K1, C- black goji berry K1, CGA- chlorogenic acid, NCGA-  
25 neochlorogenic acid, GA- gallic acid, ISO- isoquercetin, RUT- rutin.

26 Figure S2. Principal component analysis of NADES extracts for HPTLC phenolic profiles loading  
27 plot for A) chokeberry; B) blueberry; C) black goji berry.

28 Table S4. Total phenolic content (TPC), total flavonoid content (TFC), total anthocyanin content  
29 (TAC) and radical scavenging activity (RSA) in NADES and conventional extracts (mean value  
30 for duplicate  $\pm$  standard deviation).

31 Table S5. Paired t-test for spectrophotometric assays.

32 Table S6. Extraction repeatability results. Abbreviation: P1-P6- six replicates of NADES blueberry  
33 extracts, TPC- total phenolic content, TFC- total flavonoid content, TAC- total anthocyanin  
34 content and RSA- radical scavenging activity.

35 Figure S3. HPTLC profiles of six replicates of NADES blueberry extracts (P1- P6), under VIS and  
36 UV light. Zones marked with a yellow square were used to determine repeatability as peak area.

37 Table S7. Quantified phenolic compounds in selected extracts of each berry.

38 Table S8. Quantified anthocyanins in selected extracts of each berry.

39 Table S9. Paired t-test for quantified phenolic compounds in selected extracts.

40

41

42 Table S1. Composition of HBD and HBA that didn't form a eutectic system or formed liquids were  
 43 too viscosity to use for extractions.

| Composition                      | Molar ratio | Appearance                        |
|----------------------------------|-------------|-----------------------------------|
| Choline chloride : Succinic acid | 1:1         | crystallizes at lower temperature |
| L-Proline : Succinic acid        | 1:1         | crystallizes at lower temperature |
| L-Proline : Tartaric acid        | 1:1         | eutectic didn't form              |
| L-Glycine : Lactic acid          | 1:1         | eutectic didn't form              |
| L-Glycine : Glycerol             | 1:1         | eutectic didn't form              |
| L-Glycine : Glycerol             | 1:3         | eutectic didn't form              |
| L-Glycine : Urea                 | 1:1         | too viscous                       |
| L-Glycine : Succinic acid        | 1:1         | eutectic didn't form              |
| L-Glycine : Citric acid          | 1:1         | too viscous                       |
| L-Lysine : Tartaric acid         | 1:1         | eutectic didn't form              |
| L-Lysine : Citric acid           | 1:1         | too viscous                       |
| L-Lysine : Succinic acid         | 1:1         | eutectic didn't form              |
| L-Lysine : Glycerol              | 1:1         | eutectic didn't form              |
| L-Lysine : Urea                  | 1:1         | eutectic didn't form              |
| L-Lysine : Glycerol              | 1:3         | crystallizes at lower temperature |
| L-Tyrosine : Lactic acid         | 1:3         | eutectic didn't form              |
| L-Tyrosine : Glycerol            | 1:1         | eutectic didn't form              |
| L-Tyrosine : Glycerol            | 1:3         | eutectic didn't form              |
| L-Tyrosine : Malic acid          | 1:1         | eutectic didn't form              |
| L-Tyrosine : Lactic acid         | 1:1         | eutectic didn't form              |

44

45 Table S2. Optimization of mobile phase for phenolic profile of various berry fruits.

| Mobile phase | Composition                                                                        | Comment                                                                                                                                | Reference              |
|--------------|------------------------------------------------------------------------------------|----------------------------------------------------------------------------------------------------------------------------------------|------------------------|
| MP1          | ethyl acetate: methanol: acetic acid: formic acid: water<br>27/2/2/2/2 v/v/v/v/v   | immiscible mobile phase                                                                                                                | 26                     |
| MP2          | ethyl acetate: 2- butanone: formic acid: water<br>7/3/1.2/0.8 v/v/v/v              | good separation, all zones are at lower R <sub>F</sub> ,<br>tailing of zones                                                           | 27                     |
| MP3          | ethyl acetate: 2- butanone: formic acid: water<br>5/3/2/1 v/v/v/v                  | good separation, anthocyanins at lower R <sub>F</sub> ,<br>other phenolics at higher R <sub>F</sub> , tailing of zones                 | 28                     |
| MP4          | ethyl acetate: water: acetic acid: formic acid<br>100/27/11/11 v/v/v/v             | good separation, anthocyanin at lower R <sub>F</sub> ,<br>other phenolics at higher R <sub>F</sub> , sharp and well<br>– defined zones | 29                     |
| MP5          | ethyl acetate: acetic acid: formic acid: water<br>5/2/2/1 v/v/v/v                  | tailing of zones, appearance of secondary<br>front                                                                                     | modification<br>of MP4 |
| MP6          | ethyl acetate: water: acetic acid: formic acid<br>100/35/11/11 v/v/v/v             | appearance of secondary front                                                                                                          | modification<br>of MP4 |
| MP7          | ethyl acetate: water: formic acid<br>100/30/20 v/v/v                               | appearance of secondary front                                                                                                          | 30                     |
| MP8          | toluene: ethyl acetate: formic acid<br>5/4/1 v/v/v                                 | good separation, anthocyanins are at starting<br>zone, other phenolics are at higher R <sub>F</sub>                                    | 31                     |
| MP9          | ethyl acetate: 2- butanone: formic acid: acetic acid: water<br>5/3/2/2/1 v/v/v/v/v | blurry zones                                                                                                                           | modification<br>of MP2 |

46

47

48 Table S3. Optimization of mobile phase for metabolic profile of various berry fruits.

| Mobile phase | Composition                                                            | Comment                                                               | Reference |
|--------------|------------------------------------------------------------------------|-----------------------------------------------------------------------|-----------|
| MP1          | ethyl acetate: water: acetic acid: formic acid<br>100/27/11/11 v/v/v/v | too polar, zones at high R <sub>F</sub> , together with solvent front | 29        |
| MP2          | ethyl acetate: 2- butanone: formic acid: water<br>7/3/1.2/0.8 v/v/v/v  | too polar, zones at high RF, together with solvent front              | 40,41     |
| MP3          | ethyl acetate: toluene: formic acid: water<br>10/3/1.2/0.8 v/v/v/v     | immiscible mobile phase                                               | 40,41     |
| MP4          | ethyl acetate: 2: butanone: formic acid: water<br>7/3/1/1.5 v/v/v/v    | stationary phase silica gel NH <sub>2</sub> , zones didn't appear     | 42        |
| MP5          | ethyl acetate: toluene: formic acid: water<br>16/4/3/2 v/v/v/v         | too polar, zones at higher R <sub>F</sub>                             | 43        |
| MP6          | toluene: ethyl acetate<br>7/3 v/v                                      | too polar, zones at higher R <sub>F</sub>                             | —         |
| MP7          | toluene: ethyl acetate<br>6/4 v/v                                      | good separation, blurry zones                                         | —         |
| MP8          | toluene: ethyl acetate: formic acid<br>6/4/1 v/v/v                     | good separation, sharp and well- defined zones                        | —         |

49

50

51 Figure S1. HPTLC profiles of methanolic extracts and phenolic standards. Abbreviations: A-  
52 chokeberry K1, B- blueberry K1, C- black goji berry K1, CGA- chlorogenic acid, GA- gallic  
53 acid, RUT- rutin.

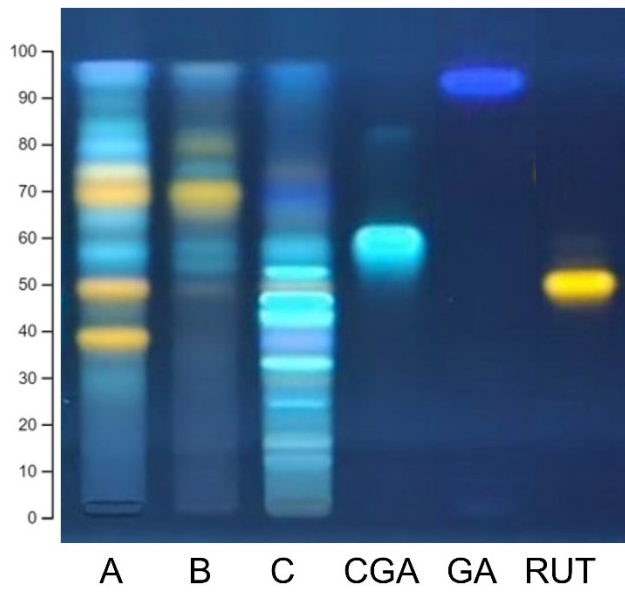

54

55

56 Figure S2. Principal component analysis of NADES extracts for HPTLC phenolic profiles  
57 loading plot for A) chokeberry; B) blueberry; C) black goji berry.

58

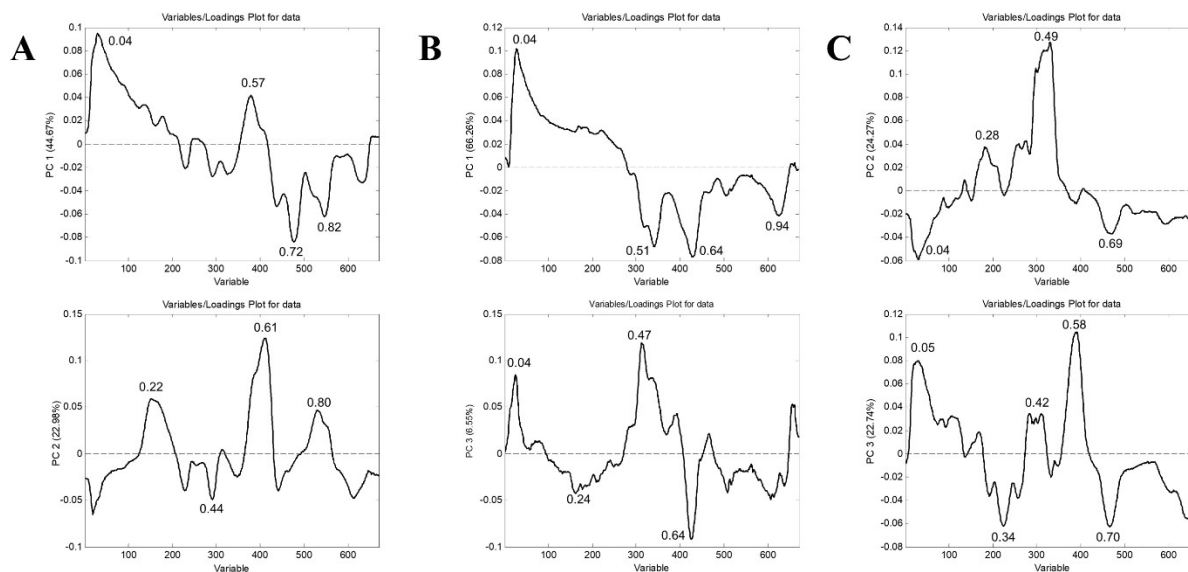

59  
60  
61

62 Table S4. Total phenolic content (TPC), total flavonoid content (TFC), total anthocyanin content  
 63 (TAC) and radical scavenging activity (RSA) in NADES and conventional extracts (mean value  
 64 for duplicate  $\pm$  standard deviation).

| <b>Chokeberry</b> |                           |                           |                            |                                 |
|-------------------|---------------------------|---------------------------|----------------------------|---------------------------------|
| <b>NADES</b>      | <b>TPC<br/>(g GAE/kg)</b> | <b>TFC<br/>(g QUE/kg)</b> | <b>RSA<br/>(mol TE/kg)</b> | <b>TAC<br/>(g cyd-3-glu/kg)</b> |
| <b>E1</b>         | 20.6 $\pm$ 1.5            | 43.3 $\pm$ 5.8            | 129.2 $\pm$ 8.2            | 1.21 $\pm$ 0.31                 |
| <b>E2</b>         | 23.6 $\pm$ 1.7            | 42.2 $\pm$ 5.6            | 111.0 $\pm$ 7.0            | 0.20 $\pm$ 0.05                 |
| <b>E3</b>         | 15.5 $\pm$ 1.1            | 26.8 $\pm$ 3.6            | 87.4 $\pm$ 5.5             | 0.15 $\pm$ 0.04                 |
| <b>E4</b>         | 21.0 $\pm$ 1.5            | 40.0 $\pm$ 5.3            | 135.4 $\pm$ 8.6            | 0.13 $\pm$ 0.03                 |
| <b>E5</b>         | 29.6 $\pm$ 2.2            | 64.2 $\pm$ 8.5            | 137.1 $\pm$ 8.7            | 4.84 $\pm$ 1.25                 |
| <b>E6</b>         | 21.8 $\pm$ 1.6            | 42.9 $\pm$ 5.7            | 124.9 $\pm$ 7.9            | 0.28 $\pm$ 0.07                 |
| <b>E7</b>         | 24.9 $\pm$ 1.8            | 50.5 $\pm$ 6.7            | 138.6 $\pm$ 8.8            | 0.30 $\pm$ 0.08                 |
| <b>E8</b>         | 14.0 $\pm$ 1.0            | 26.5 $\pm$ 3.5            | 70.6 $\pm$ 4.5             | 1.37 $\pm$ 0.35                 |
| <b>E9</b>         | 10.0 $\pm$ 0.7            | 14.6 $\pm$ 1.9            | 142.8 $\pm$ 9.0            | 0.08 $\pm$ 0.02                 |
| <b>E10</b>        | 12.2 $\pm$ 0.9            | 20.7 $\pm$ 2.8            | 64.3 $\pm$ 4.1             | 0.12 $\pm$ 0.03                 |
| <b>E11</b>        | 33.6 $\pm$ 2.4            | 48.4 $\pm$ 6.4            | 150.9 $\pm$ 9.5            | 2.94 $\pm$ 0.76                 |
| <b>E12</b>        | 30.5 $\pm$ 2.2            | 45.4 $\pm$ 6.0            | 163 $\pm$ 11               | 4.07 $\pm$ 1.05                 |
| <b>E13</b>        | 26.4 $\pm$ 1.9            | 36.2 $\pm$ 4.8            | 148.8 $\pm$ 9.4            | 3.83 $\pm$ 0.99                 |
| <b>E14</b>        | 28.1 $\pm$ 2.0            | 59.0 $\pm$ 7.8            | 156 $\pm$ 10               | 3.51 $\pm$ 0.91                 |
| <b>E15</b>        | 27.6 $\pm$ 2.0            | 64.8 $\pm$ 8.6            | 147.2 $\pm$ 9.3            | 0.53 $\pm$ 0.14                 |
| <b>E16</b>        | 29.3 $\pm$ 2.1            | 53.4 $\pm$ 7.1            | 147.9 $\pm$ 9.3            | 0.29 $\pm$ 0.07                 |
| <b>E17</b>        | 29.6 $\pm$ 2.2            | 52.6 $\pm$ 7.0            | 150.0 $\pm$ 9.5            | 0.32 $\pm$ 0.08                 |
| <b>E18</b>        | 29.0 $\pm$ 2.1            | 52.9 $\pm$ 7.0            | 138.1 $\pm$ 8.7            | 0.61 $\pm$ 0.16                 |
| <b>E19</b>        | 24.3 $\pm$ 1.8            | 44.6 $\pm$ 5.9            | 124.7 $\pm$ 7.9            | 1.78 $\pm$ 0.46                 |
| <b>E20</b>        | 12.2 $\pm$ 0.9            | 16.9 $\pm$ 2.2            | 54.9 $\pm$ 3.5             | 0.09 $\pm$ 0.02                 |
| <b>E21</b>        | 34.9 $\pm$ 2.5            | 49.9 $\pm$ 6.6            | 138.9 $\pm$ 8.8            | 0.73 $\pm$ 0.19                 |
| <b>E22</b>        | 8.2 $\pm$ 0.6             | 26.5 $\pm$ 3.5            | 48.1 $\pm$ 3.0             | 0.04 $\pm$ 0.01                 |
| <b>E23</b>        | 12.7 $\pm$ 0.9            | 19.2 $\pm$ 2.5            | 63.8 $\pm$ 4.0             | 0.05 $\pm$ 0.01                 |
| <b>E24</b>        | 15.9 $\pm$ 1.2            | 24.3 $\pm$ 3.2            | 107.3 $\pm$ 6.8            | 0.11 $\pm$ 0.03                 |
| <b>E25</b>        | 32.6 $\pm$ 2.4            | 43.8 $\pm$ 5.8            | 145.9 $\pm$ 9.2            | 0.25 $\pm$ 0.06                 |
| <b>E26</b>        | 18.3 $\pm$ 1.3            | 27.1 $\pm$ 3.6            | 117.0 $\pm$ 7.4            | 1.60 $\pm$ 0.41                 |
| <b>E27</b>        | 14.9 $\pm$ 1.1            | 20.0 $\pm$ 2.7            | 109.6 $\pm$ 6.9            | 1.16 $\pm$ 0.30                 |
| <b>E28</b>        | 14.6 $\pm$ 1.1            | 0.13 $\pm$ 0.02           | 33.9 $\pm$ 2.1             | 0.49 $\pm$ 0.13                 |
| <b>E29</b>        | 14.7 $\pm$ 1.1            | 7.5 $\pm$ 1.0             | 48.1 $\pm$ 3.0             | 1.25 $\pm$ 0.32                 |
| <b>E30</b>        | 8.1 $\pm$ 0.6             | 20.0 $\pm$ 2.7            | 55.7 $\pm$ 3.5             | 0.08 $\pm$ 0.02                 |
| <b>E31</b>        | 11.0 $\pm$ 0.8            | 18.3 $\pm$ 2.4            | 55.0 $\pm$ 3.5             | 0.13 $\pm$ 0.03                 |
| <b>E32</b>        | 11.3 $\pm$ 0.8            | 18.1 $\pm$ 2.4            | 59.3 $\pm$ 3.7             | 0.09 $\pm$ 0.02                 |
| <b>E33</b>        | 14.8 $\pm$ 1.1            | 21.3 $\pm$ 2.8            | 124.1 $\pm$ 7.8            | 0.16 $\pm$ 0.04                 |
| <b>E34</b>        | 14.7 $\pm$ 1.1            | 22.2 $\pm$ 2.9            | 111.0 $\pm$ 7.0            | 0.13 $\pm$ 0.03                 |
| <b>E35</b>        | 12.2 $\pm$ 0.9            | 22.5 $\pm$ 3.0            | 62.7 $\pm$ 4.0             | 0.11 $\pm$ 0.03                 |
| <b>E36</b>        | 15.3 $\pm$ 1.1            | 8.3 $\pm$ 1.1             | 47.0 $\pm$ 3.0             | 0.02 $\pm$ 0.01                 |
| <b>K1</b>         | 19.2 $\pm$ 1.4            | 26.4 $\pm$ 3.5            | 115.9 $\pm$ 7.3            | 0.10 $\pm$ 0.02                 |
| <b>K2</b>         | 30.0 $\pm$ 2.2            | 54.2 $\pm$ 7.2            | 158 $\pm$ 10               | 0.20 $\pm$ 0.05                 |



65 Table S4. continued

| <b>Blueberry</b> |                           |                           |                            |                                 |
|------------------|---------------------------|---------------------------|----------------------------|---------------------------------|
| <b>NADES</b>     | <b>TPC<br/>(g GAE/kg)</b> | <b>TFC<br/>(g QUE/kg)</b> | <b>RSA<br/>(mol TE/kg)</b> | <b>TAC<br/>(g cyd-3-glu/kg)</b> |
| <b>E1</b>        | 8.5 ± 0.6                 | 16.7 ± 2.2                | 40.1 ± 2.5                 | 0.39 ± 0.10                     |
| <b>E2</b>        | 12.6 ± 0.9                | 10.0 ± 1.3                | 55.0 ± 3.5                 | 0.12 ± 0.03                     |
| <b>E3</b>        | 9.0 ± 0.7                 | 12.3 ± 1.6                | 52.6 ± 3.3                 | 0.12 ± 0.03                     |
| <b>E4</b>        | 10.6 ± 0.8                | 7.6 ± 1.0                 | 44.8 ± 2.8                 | 0.07 ± 0.02                     |
| <b>E5</b>        | 14.3 ± 1.0                | 26.3 ± 3.5                | 69.0 ± 4.4                 | 2.63 ± 0.68                     |
| <b>E6</b>        | 10.7 ± 0.8                | 13.2 ± 1.8                | 54.0 ± 3.4                 | 0.18 ± 0.05                     |
| <b>E7</b>        | 12.7 ± 0.9                | 21.5 ± 2.9                | 64.5 ± 4.1                 | 0.18 ± 0.05                     |
| <b>E8</b>        | 9.8 ± 0.7                 | 11.8 ± 1.6                | 47.9 ± 3.0                 | 1.05 ± 0.27                     |
| <b>E9</b>        | 9.7 ± 0.7                 | 7.1 ± 0.9                 | 49.1 ± 3.1                 | 0.09 ± 0.02                     |
| <b>E10</b>       | 9.1 ± 0.7                 | 3.6 ± 0.5                 | 42.0 ± 2.7                 | 0.09 ± 0.02                     |
| <b>E11</b>       | 14.4 ± 1.1                | 25.5 ± 3.4                | 57.9 ± 3.7                 | 1.56 ± 0.40                     |
| <b>E12</b>       | 16.8 ± 1.2                | 16.7 ± 2.2                | 70.9 ± 4.5                 | 1.86 ± 0.48                     |
| <b>E13</b>       | 15.3 ± 1.1                | 11.0 ± 1.5                | 66.3 ± 4.2                 | 2.09 ± 0.54                     |
| <b>E14</b>       | 15.3 ± 1.1                | 24.7 ± 3.3                | 68.1 ± 4.3                 | 1.17 ± 0.30                     |
| <b>E15</b>       | 12.8 ± 0.9                | 22.2 ± 2.9                | 56.2 ± 3.6                 | 0.28 ± 0.07                     |
| <b>E16</b>       | 16.5 ± 1.2                | 16.4 ± 2.2                | 62.8 ± 4.0                 | 0.19 ± 0.05                     |
| <b>E17</b>       | 17.2 ± 1.3                | 18.0 ± 2.4                | 57.3 ± 3.6                 | 0.25 ± 0.06                     |
| <b>E18</b>       | 16.2 ± 1.2                | 15.1 ± 2.0                | 56.3 ± 3.6                 | 0.35 ± 0.09                     |
| <b>E19</b>       | 9.4 ± 0.7                 | 5.6 ± 0.8                 | 39.8 ± 2.5                 | 0.42 ± 0.11                     |
| <b>E20</b>       | 11.7 ± 0.9                | 6.7 ± 0.9                 | 45.2 ± 2.9                 | 0.31 ± 0.08                     |
| <b>E21</b>       | 13.7 ± 1.0                | 6.9 ± 0.9                 | 38.2 ± 2.4                 | 0.39 ± 0.10                     |
| <b>E22</b>       | 6.5 ± 0.5                 | 2.2 ± 0.3                 | 44.5 ± 2.8                 | 0.05 ± 0.01                     |
| <b>E23</b>       | 7.5 ± 0.5                 | 6.3 ± 0.8                 | 36.4 ± 2.3                 | 0.07 ± 0.02                     |
| <b>E24</b>       | 4.0 ± 0.3                 | 1.9 ± 0.3                 | 15.6 ± 1.0                 | 0.02 ± 0.01                     |
| <b>E25</b>       | 14.1 ± 1.0                | 23.8 ± 3.2                | 49.7 ± 3.1                 | 0.87 ± 0.22                     |
| <b>E26</b>       | 9.4 ± 0.7                 | 8.6 ± 1.1                 | 42.4 ± 2.7                 | 0.86 ± 0.22                     |
| <b>E27</b>       | 8.6 ± 0.6                 | 15.8 ± 2.1                | 38.7 ± 2.4                 | 0.85 ± 0.22                     |
| <b>E28</b>       | 12.1 ± 0.9                | 8.4 ± 1.1                 | 31.5 ± 2.0                 | 0.30 ± 0.08                     |
| <b>E29</b>       | 11.7 ± 0.9                | 3.0 ± 0.4                 | 33.7 ± 2.1                 | 0.76 ± 0.20                     |
| <b>E30</b>       | 3.2 ± 0.2                 | 2.1 ± 0.3                 | 21.7 ± 1.4                 | 0.03 ± 0.01                     |
| <b>E31</b>       | 7.1 ± 0.5                 | 4.5 ± 0.6                 | 41.6 ± 2.6                 | 0.09 ± 0.02                     |
| <b>E32</b>       | 2.8 ± 0.2                 | 11.5 ± 1.5                | 19.4 ± 1.2                 | 0.03 ± 0.01                     |
| <b>E33</b>       | 7.1 ± 0.5                 | 10.2 ± 1.4                | 31.7 ± 2.0                 | 0.14 ± 0.04                     |
| <b>E34</b>       | 10.4 ± 0.8                | 9.7 ± 1.3                 | 46.0 ± 2.9                 | 0.22 ± 0.06                     |
| <b>E35</b>       | 7.9 ± 0.6                 | 7.7 ± 1.0                 | 42.9 ± 2.7                 | 0.10 ± 0.03                     |
| <b>E36</b>       | 12.0 ± 0.9                | 11.0 ± 1.5                | 40.0 ± 2.5                 | 0.07 ± 0.02                     |
| <b>K1</b>        | 9.7 ± 0.7                 | 9.7 ± 1.3                 | 48.2 ± 3.0                 | 0.15 ± 0.04                     |
| <b>K2</b>        | 10.5 ± 0.8                | 7.8 ± 1.0                 | 44.9 ± 2.8                 | 0.08 ± 0.02                     |

| <b>Black goji</b> |                           |                           |                            |                                 |
|-------------------|---------------------------|---------------------------|----------------------------|---------------------------------|
| <b>NADES</b>      | <b>TPC<br/>(g GAE/kg)</b> | <b>TFC<br/>(g QUE/kg)</b> | <b>RSA<br/>(mol TE/kg)</b> | <b>TAC<br/>(g cyd-3-glu/kg)</b> |
| <b>E1</b>         | 23.1 ± 1.7                | 10.3 ± 1.4                | 90.4 ± 5.7                 | 2.17 ± 0.56                     |
| <b>E2</b>         | 27.3 ± 2.0                | 14.2 ± 1.9                | 98.7 ± 6.2                 | 0.63 ± 0.16                     |
| <b>E3</b>         | 21.3 ± 1.5                | 7.7 ± 1.0                 | 113.9 ± 7.2                | 1.53 ± 0.39                     |
| <b>E4</b>         | 27.7 ± 2.0                | 15.1 ± 2.0                | 112.8 ± 7.1                | 0.53 ± 0.14                     |
| <b>E5</b>         | 33.8 ± 2.5                | 37.2 ± 4.9                | 143.1 ± 9.0                | 4.98 ± 1.28                     |
| <b>E6</b>         | 22.6 ± 1.6                | 7.3 ± 1.0                 | 108.1 ± 6.8                | 1.64 ± 0.42                     |
| <b>E7</b>         | 21.7 ± 1.6                | 8.2 ± 1.1                 | 87.1 ± 5.5                 | 0.92 ± 0.24                     |
| <b>E8</b>         | 24.7 ± 1.8                | 17.5 ± 2.3                | 98.9 ± 6.2                 | 3.99 ± 1.03                     |
| <b>E9</b>         | 34.4 ± 2.5                | 2.4 ± 0.3                 | 83.2 ± 5.3                 | 0.67 ± 0.17                     |
| <b>E10</b>        | 18.2 ± 1.3                | 20.8 ± 2.8                | 48.6 ± 3.1                 | 0.67 ± 0.17                     |
| <b>E11</b>        | 41.8 ± 3.0                | 45.4 ± 6.0                | 133.0 ± 8.4                | 4.80 ± 1.24                     |
| <b>E12</b>        | 35.7 ± 2.6                | 34.7 ± 4.6                | 128.3 ± 8.1                | 4.20 ± 1.08                     |
| <b>E13</b>        | 34.0 ± 2.5                | 23.8 ± 3.2                | 126.2 ± 8.0                | 3.56 ± 0.92                     |
| <b>E14</b>        | 35.0 ± 2.6                | 32.0 ± 4.3                | 119.6 ± 7.6                | 4.53 ± 1.17                     |
| <b>E15</b>        | 33.6 ± 2.4                | 26.8 ± 3.6                | 113.3 ± 7.2                | 4.88 ± 1.26                     |
| <b>E16</b>        | 37.3 ± 2.7                | 30.3 ± 4.0                | 126.9 ± 8.0                | 2.89 ± 0.75                     |
| <b>E17</b>        | 37.9 ± 2.8                | 30.3 ± 4.0                | 132.6 ± 8.4                | 2.03 ± 0.52                     |
| <b>E18</b>        | 33.0 ± 2.4                | 20.1 ± 2.7                | 123.8 ± 7.8                | 1.43 ± 0.37                     |
| <b>E19</b>        | 21.5 ± 1.6                | 4.4 ± 0.6                 | 125.9 ± 8.0                | 2.06 ± 0.53                     |
| <b>E20</b>        | 34.1 ± 2.5                | 18.9 ± 2.5                | 115.9 ± 7.3                | 2.65 ± 0.68                     |
| <b>E21</b>        | 40.0 ± 2.9                | 27.5 ± 3.7                | 128.6 ± 8.1                | 3.17 ± 0.82                     |
| <b>E22</b>        | 18.2 ± 1.3                | 20.6 ± 2.7                | 51.2 ± 3.2                 | 0.30 ± 0.08                     |
| <b>E23</b>        | 15.4 ± 1.1                | 10.5 ± 1.4                | 46.5 ± 2.9                 | 0.41 ± 0.11                     |
| <b>E24</b>        | 11.7 ± 0.9                | 2.2 ± 0.3                 | 42.0 ± 2.7                 | 0.10 ± 0.02                     |
| <b>E25</b>        | 32.8 ± 2.4                | 19.5 ± 2.6                | 116.9 ± 7.4                | 2.14 ± 0.55                     |
| <b>E26</b>        | 28.7 ± 2.1                | 16.8 ± 2.2                | 127.4 ± 8.0                | 2.02 ± 0.52                     |
| <b>E27</b>        | 25.4 ± 1.8                | 8.8 ± 1.2                 | 114.6 ± 7.2                | 2.56 ± 0.66                     |
| <b>E28</b>        | 22.3 ± 1.6                | 5.9 ± 0.8                 | 88.5 ± 5.6                 | 0.79 ± 0.20                     |
| <b>E29</b>        | 25.5 ± 1.9                | 4.4 ± 0.6                 | 95.4 ± 6.0                 | 1.00 ± 0.26                     |
| <b>E30</b>        | 13.7 ± 1.0                | 1.9 ± 0.3                 | 49.3 ± 3.1                 | 0.06 ± 0.01                     |
| <b>E31</b>        | 20.4 ± 1.5                | 7.9 ± 1.0                 | 102.0 ± 6.4                | 0.97 ± 0.25                     |
| <b>E32</b>        | 15.5 ± 1.1                | 3.0 ± 0.4                 | 47.3 ± 3.0                 | 0.14 ± 0.04                     |
| <b>E33</b>        | 26.6 ± 1.9                | 3.5 ± 0.5                 | 96.9 ± 6.1                 | 1.30 ± 0.33                     |
| <b>E34</b>        | 25.3 ± 1.8                | 18.1 ± 2.4                | 90.1 ± 5.7                 | 1.71 ± 0.44                     |
| <b>E35</b>        | 20.1 ± 1.5                | 6.2 ± 0.8                 | 94.1 ± 5.9                 | 0.37 ± 0.09                     |
| <b>E36</b>        | 24.0 ± 1.7                | 3.8 ± 0.5                 | 96.3 ± 6.1                 | 0.20 ± 0.05                     |
| <b>K1</b>         | 22.6 ± 1.6                | 2.9 ± 0.4                 | 98.6 ± 6.2                 | 0.20 ± 0.05                     |
| <b>K2</b>         | 39.8 ± 2.9                | 26.4 ± 3.5                | 142.1 ± 9.0                | 1.67 ± 0.43                     |

69 Table S5. Paired t-test for spectrophotometric assays.

|           | Chokeberry |      | Blueberry |      | Black goji berry |      |
|-----------|------------|------|-----------|------|------------------|------|
|           | $t^*$      | $P$  | $t^*$     | $P$  | $t^*$            | $P$  |
| K1 vs E1  | 2.01       | 0.14 | 0.16      | 0.88 | 0.13             | 0.91 |
| K1 vs E2  | 0.88       | 0.44 | 1.59      | 0.21 | 1.59             | 0.21 |
| K1 vs E3  | 1.14       | 0.34 | 1.33      | 0.27 | 1.38             | 0.26 |
| K1 vs E4  | 1.87       | 0.16 | 1.20      | 0.32 | 2.48             | 0.09 |
| K1 vs E5  | 2.55       | 0.08 | 2.48      | 0.09 | 2.52             | 0.09 |
| K1 vs E6  | 1.94       | 0.15 | 1.99      | 0.14 | 1.84             | 0.16 |
| K1 vs E7  | 2.19       | 0.12 | 2.06      | 0.13 | 0.45             | 0.68 |
| K1 vs E8  | 1.11       | 0.35 | 1.34      | 0.27 | 1.62             | 0.20 |
| K1 vs E9  | 0.17       | 0.88 | 0.56      | 0.61 | 0.16             | 0.88 |
| K1 vs E10 | 1.34       | 0.27 | 1.92      | 0.15 | 0.62             | 0.58 |
| K1 vs E11 | 2.76       | 0.07 | 2.52      | 0.09 | 3.01             | 0.06 |
| K1 vs E12 | 2.17       | 0.12 | 2.13      | 0.12 | 2.94             | 0.06 |
| K1 vs E13 | 2.03       | 0.14 | 1.73      | 0.18 | 2.98             | 0.06 |
| K1 vs E14 | 2.32       | 0.10 | 2.41      | 0.09 | 3.13             | 0.05 |
| K1 vs E15 | 2.17       | 0.12 | 2.18      | 0.12 | <b>3.37</b>      | 0.04 |
| K1 vs E16 | 2.35       | 0.10 | 2.37      | 0.10 | 3.02             | 0.06 |
| K1 vs E17 | 2.32       | 0.10 | 3.01      | 0.06 | 2.77             | 0.07 |
| K1 vs E18 | 2.49       | 0.09 | 2.96      | 0.06 | 2.66             | 0.08 |
| K1 vs E19 | 2.38       | 0.10 | 1.55      | 0.22 | 1.11             | 0.35 |
| K1 vs E20 | 1.38       | 0.26 | 0.77      | 0.50 | <b>3.52</b>      | 0.04 |
| K1 vs E21 | 2.95       | 0.06 | 0.71      | 0.53 | <b>3.20</b>      | 0.05 |
| K1 vs E22 | 1.21       | 0.31 | 2.39      | 0.10 | 0.61             | 0.58 |
| K1 vs E23 | 1.37       | 0.26 | 1.70      | 0.19 | 0.96             | 0.41 |
| K1 vs E24 | 1.89       | 0.16 | 1.61      | 0.21 | 1.27             | 0.29 |
| K1 vs E25 | 2.48       | 0.09 | 1.68      | 0.19 | 3.17             | 0.05 |
| K1 vs E26 | 1.14       | 0.34 | 1.11      | 0.35 | 2.14             | 0.12 |
| K1 vs E27 | 2.27       | 0.11 | 0.29      | 0.79 | 2.14             | 0.12 |
| K1 vs E28 | 1.49       | 0.23 | 0.89      | 0.44 | 0.60             | 0.59 |
| K1 vs E29 | 1.44       | 0.25 | 1.22      | 0.31 | 0.39             | 0.72 |
| K1 vs E30 | 1.41       | 0.25 | 1.79      | 0.17 | 1.27             | 0.29 |
| K1 vs E31 | 1.38       | 0.26 | 2.50      | 0.09 | 1.11             | 0.35 |
| K1 vs E32 | 1.40       | 0.25 | 1.21      | 0.31 | 1.18             | 0.32 |
| K1 vs E33 | 0.11       | 0.92 | 1.15      | 0.33 | 0.86             | 0.45 |
| K1 vs E34 | 2.94       | 0.06 | 0.57      | 0.61 | 0.56             | 0.61 |
| K1 vs E35 | 1.28       | 0.29 | 2.09      | 0.13 | 0.52             | 0.64 |
| K1 vs E36 | 1.43       | 0.25 | 0.49      | 0.66 | 0.02             | 0.99 |

70  $*t_{cr}=3.18$

71 Table S5. continued

|           | Chokeberry |      | Blueberry |      | Black goji berry |      |
|-----------|------------|------|-----------|------|------------------|------|
|           | $t^*$      | $P$  | $t^*$     | $P$  | $t^*$            | $P$  |
| K2 vs E1  | 1.94       | 0.15 | 0.21      | 0.84 | 1.91             | 0.15 |
| K2 vs E2  | 1.55       | 0.22 | 1.63      | 0.20 | 1.90             | 0.15 |
| K2 vs E3  | 1.85       | 0.16 | 1.27      | 0.29 | 2.79             | 0.07 |
| K2 vs E4  | 2.43       | 0.09 | 0.70      | 0.53 | 2.31             | 0.10 |
| K2 vs E5  | 0.24       | 0.82 | 2.28      | 0.11 | 0.65             | 0.56 |
| K2 vs E6  | 1.85       | 0.16 | 1.69      | 0.19 | 2.53             | 0.09 |
| K2 vs E7  | 1.65       | 0.20 | 1.91      | 0.15 | 2.02             | 0.14 |
| K2 vs E8  | 1.69       | 0.19 | 1.73      | 0.18 | 1.68             | 0.19 |
| K2 vs E9  | 2.30       | 0.11 | 0.58      | 0.60 | 1.70             | 0.19 |
| K2 vs E10 | 1.78       | 0.17 | 2.34      | 0.10 | 1.42             | 0.25 |
| K2 vs E11 | 0.58       | 0.60 | 2.37      | 0.10 | 0.65             | 0.56 |
| K2 vs E12 | 0.03       | 0.98 | 2.03      | 0.14 | 0.38             | 0.73 |
| K2 vs E13 | 1.49       | 0.23 | 1.73      | 0.18 | 1.49             | 0.23 |
| K2 vs E14 | 1.37       | 0.26 | 2.23      | 0.11 | 0.75             | 0.51 |
| K2 vs E15 | 0.12       | 0.91 | 2.05      | 0.13 | 1.08             | 0.36 |
| K2 vs E16 | 1.19       | 0.32 | 2.20      | 0.12 | 0.74             | 0.51 |
| K2 vs E17 | 1.31       | 0.28 | 2.75      | 0.07 | 0.64             | 0.57 |
| K2 vs E18 | 1.12       | 0.34 | 2.68      | 0.08 | 2.10             | 0.13 |
| K2 vs E19 | 1.56       | 0.22 | 1.74      | 0.18 | 2.83             | 0.07 |
| K2 vs E20 | 1.76       | 0.18 | 0.35      | 0.75 | 1.66             | 0.20 |
| K2 vs E21 | 0.85       | 0.46 | 0.48      | 0.66 | 0.75             | 0.51 |
| K2 vs E22 | 1.66       | 0.20 | 1.81      | 0.17 | 1.44             | 0.25 |
| K2 vs E23 | 1.79       | 0.17 | 1.77      | 0.17 | 1.63             | 0.20 |
| K2 vs E24 | 2.18       | 0.12 | 1.62      | 0.20 | 1.80             | 0.17 |
| K2 vs E25 | 1.34       | 0.27 | 1.89      | 0.16 | 1.77             | 0.17 |
| K2 vs E26 | 2.13       | 0.12 | 0.61      | 0.58 | 2.73             | 0.07 |
| K2 vs E27 | 2.24       | 0.11 | 0.06      | 0.96 | 2.49             | 0.09 |
| K2 vs E28 | 1.74       | 0.18 | 0.78      | 0.49 | 2.10             | 0.13 |
| K2 vs E29 | 1.74       | 0.18 | 1.23      | 0.31 | 2.17             | 0.12 |
| K2 vs E30 | 1.80       | 0.17 | 1.83      | 0.16 | 1.85             | 0.16 |
| K2 vs E31 | 1.76       | 0.18 | 2.99      | 0.06 | 2.44             | 0.09 |
| K2 vs E32 | 1.79       | 0.17 | 1.14      | 0.34 | 1.78             | 0.17 |
| K2 vs E33 | 2.54       | 0.08 | 1.02      | 0.38 | 2.16             | 0.12 |
| K2 vs E34 | 2.32       | 0.10 | 1.60      | 0.21 | 1.63             | 0.20 |
| K2 vs E35 | 1.75       | 0.18 | 1.75      | 0.18 | 2.32             | 0.10 |
| K2 vs E36 | 1.74       | 0.18 | 0.03      | 0.98 | 2.32             | 0.10 |
| K1 vs K2  | 2.18       | 0.12 | 1.20      | 0.32 | 2.47             | 0.09 |

72  $*t_{cr}=3.18$

73 Table S6. Extraction repeatability results. Abbreviation: P1-P6- six replicates of NADES  
 74 blueberry extracts, TPC- total phenolic content, TFC- total flavonoid content, TAC- total  
 75 anthocyanin content and RSA- radical scavenging activity.

|             | TPC<br>(g GAE/kg) | TFC<br>(g QUE/kg) | TAC<br>(g cyd-3-<br>glu/kg) | RSA<br>(mol TE/kg) | Anthocyanin<br>Peak area | Phenolic<br>Peak area |
|-------------|-------------------|-------------------|-----------------------------|--------------------|--------------------------|-----------------------|
| <b>P1</b>   | 13.1              | 19.9              | 0.271                       | 65.9               | 2817                     | 21724                 |
| <b>P2</b>   | 13.9              | 22.7              | 0.287                       | 61.5               | 3368                     | 25499                 |
| <b>P3</b>   | 12.9              | 19.8              | 0.273                       | 61.2               | 2801                     | 24529                 |
| <b>P4</b>   | 12.7              | 22.4              | 0.247                       | 60.4               | 2576                     | 23262                 |
| <b>P5</b>   | 14.0              | 27.5              | 0.308                       | 64.6               | 3503                     | 25061                 |
| <b>P6</b>   | 15.4              | 20.2              | 0.466                       | 71.1               | 4206                     | 29821                 |
| <b>Avg.</b> | 13.7              | 22.1              | 0.309                       | 64.1               | 3212                     | 24983                 |
| <b>SD</b>   | 1.0               | 2.9               | 0.080                       | 4.1                | 604                      | 2738                  |
| <b>RSD</b>  | 7.3%              | 13.3%             | 25.8%                       | 6.3%               | 18.8%                    | 11.0%                 |

76

77 Figure S3. HPTLC profiles of six replicates of NADES blueberry extracts (P1- P6), under VIS  
 78 and UV light. Zones marked with a yellow square were used to determine repeatability as peak  
 79 area.

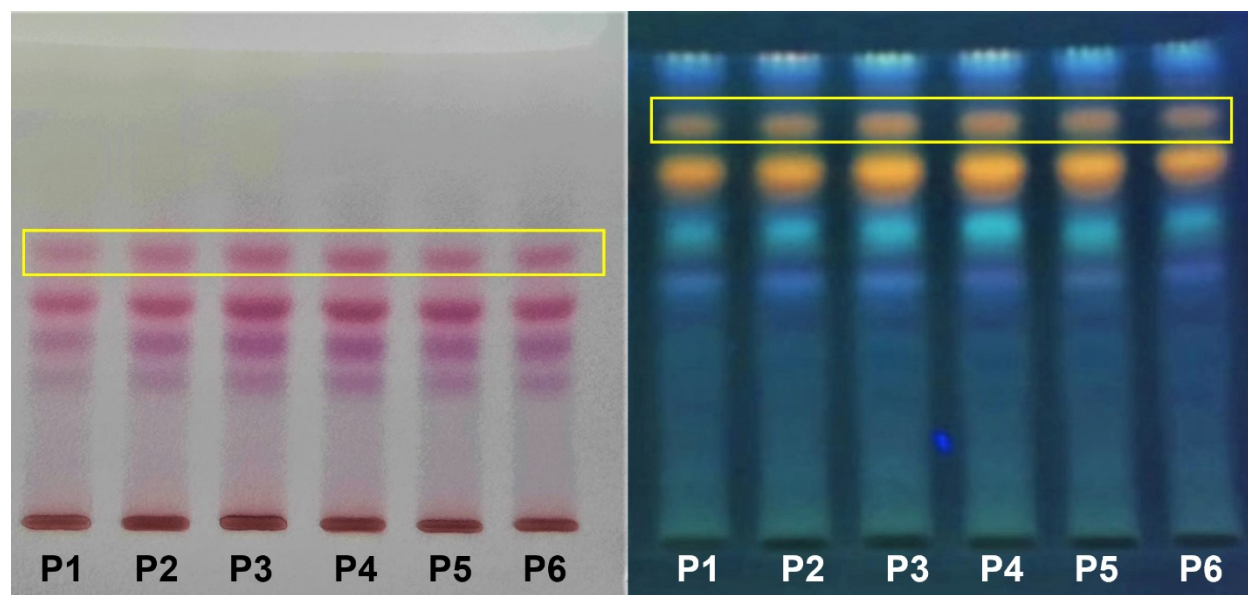

80

81

82 Table S7. Quantified phenolic compounds in selected extracts of each berry.

|                  | Phenolic compounds (mg kg <sup>-1</sup> ) * |         |       |       |       |        |      |        |       |      |       |        |       |        |       |      |      |
|------------------|---------------------------------------------|---------|-------|-------|-------|--------|------|--------|-------|------|-------|--------|-------|--------|-------|------|------|
|                  | GA                                          | CGA     | CA    | p-CA  | QUE   | RUT    | QR   | HYP    | ISR   | I3R  | I3G   | EC     | NAR   | K3G    | MYR   | AE   | GAL  |
| Chokeberry       |                                             |         |       |       |       |        |      |        |       |      |       |        |       |        |       |      |      |
| E5               | 0.28                                        | 870.89  | 3.17  | NF    | 34.97 | 187.48 | 0.22 | 95.98  | 2.01  | 5.85 | 2.66  | 33.18  | 19.55 | 105.21 | NF    | NF   | NF   |
| E12              | 1.32                                        | 1055.11 | 8.28  | NF    | 29.44 | 200.24 | 0.32 | 115.19 | 1.68  | 6.06 | 3.17  | 39.41  | 84.25 | 84.24  | NF    | NF   | NF   |
| E14              | 2.24                                        | 1022.82 | 8.47  | NF    | 23.05 | 187.94 | 0.32 | 121.77 | 1.24  | 5.81 | 2.37  | 32.50  | 52.66 | 76.33  | NF    | NF   | NF   |
| E21              | 0.18                                        | 1007.67 | 5.39  | NF    | 91.87 | 180.55 | 0.22 | 94.17  | 1.71  | 6.32 | 2.82  | 31.12  | 10.74 | 8.99   | NF    | NF   | NF   |
| E8               | 0.26                                        | 265.18  | 2.76  | NF    | 6.73  | 222.97 | 0.21 | 129.97 | 0.34  | 6.01 | 2.87  | 21.82  | 22.77 | 44.45  | NF    | NF   | NF   |
| K1               | 0.91                                        | 556.97  | 41.98 | NF    | 4.10  | 232.13 | 0.37 | 148.99 | 0.21  | 7.48 | 2.84  | 34.90  | 53.85 | 17.18  | NF    | NF   | NF   |
| Blueberry        |                                             |         |       |       |       |        |      |        |       |      |       |        |       |        |       |      |      |
| E5               | 19.97                                       | 41.28   | 4.30  | NF    | 53.39 | 12.19  | 0.14 | 24.22  | 32.39 | 3.72 | 18.97 | 4.90   | NF    | 3.06   | 25.50 | 2.54 | NF   |
| E12              | 21.61                                       | 158.80  | 6.42  | NF    | 61.39 | 49.76  | 0.38 | 41.53  | 30.95 | 3.88 | 14.24 | 8.69   | 15.35 | 9.37   | 29.62 | 3.25 | NF   |
| E17              | 15.33                                       | 191.03  | 8.51  | NF    | 7.40  | 58.22  | 0.41 | 49.40  | 6.75  | 4.45 | 8.10  | 11.57  | 39.70 | 11.61  | 8.55  | 2.94 | NF   |
| E29              | 10.35                                       | 76.54   | 4.34  | NF    | 31.43 | 27.64  | 0.23 | 32.86  | 18.75 | 3.21 | 5.48  | 5.44   | 10.91 | 5.92   | 18.42 | 3.12 | NF   |
| E25              | 16.70                                       | 49.66   | 3.82  | NF    | 46.41 | 18.80  | 0.24 | 30.12  | 30.35 | 3.51 | 6.88  | 4.13   | NF    | 2.20   | 8.17  | 4.42 | NF   |
| K1               | 6.40                                        | 64.61   | 6.06  | NF    | 3.49  | 37.94  | 0.47 | 37.93  | 1.97  | 4.72 | 7.43  | 5.84   | 17.13 | 4.97   | 5.61  | NF   | NF   |
| Black goji berry |                                             |         |       |       |       |        |      |        |       |      |       |        |       |        |       |      |      |
| E5               | 0.97                                        | 495.89  | 10.05 | 31.42 | 1.78  | 162.49 | 0.09 | 3.93   | 2.38  | 8.81 | 0.51  | 205.05 | 13.64 | 3.30   | 2.79  | NF   | NF   |
| E11              | 1.79                                        | 551.27  | 7.81  | 72.40 | 2.07  | 178.97 | 0.20 | 5.14   | 3.28  | 7.71 | 0.64  | 245.65 | 19.02 | 3.08   | 2.71  | 3.81 | 2.08 |
| E15              | 1.12                                        | 344.87  | 5.04  | 27.81 | 10.67 | 200.09 | 0.33 | 24.63  | 5.79  | 9.23 | 2.16  | 120.43 | 49.78 | 7.85   | 3.73  | 3.66 | 1.93 |
| E21              | 2.28                                        | 418.82  | 6.83  | 29.73 | 1.71  | 146.61 | 0.09 | 4.35   | 1.92  | 7.19 | 0.68  | 143.99 | 17.22 | 2.30   | NF    | 2.72 | NF   |
| E34              | NF                                          | 106.95  | 3.97  | 40.90 | 2.05  | 186.43 | 0.14 | 5.55   | 2.20  | 7.46 | 0.62  | 89.46  | 14.93 | 3.07   | 3.09  | 3.33 | NF   |
| K1               | 1.20                                        | 685.96  | 10.77 | 35.52 | 1.44  | 212.27 | 0.08 | 4.99   | 1.33  | 8.68 | 0.92  | 152.18 | 11.90 | 2.64   | 2.60  | 3.42 | NF   |

83 \*Abbreviations: GA- Gallic acid, CGA- Chlorogenic acid, CA- Caffeic acid, p-CA- p-Coumaric acid, QUE- Quercetin, RUT- Rutin, QR- Quercetin-  
84 3-O-rhamnoside Quercitrin, HYP- Hyperoside, ISR- Isorhamnetin, I3R- Isorhametin-3-O-rutinoside, I3G- Isorhametin-3-O-glucoside, EC-  
85 Epictchin, NAR- Naringin, K3G- Kaempferol-3-O-glucoside, MYR- Myricetin, AE- Aesculetin, GAL- Galangin, NF- not found.

87 Table S8. Quantified anthocyanins in selected extracts of each berry.

| Anthocyanins (mg kg <sup>-1</sup> ) * |        |       |          |          |         |       |       |         |      |       |        |
|---------------------------------------|--------|-------|----------|----------|---------|-------|-------|---------|------|-------|--------|
|                                       | D3G    | C3S   | C3,5-diG | M3,5-diG | C3G     | C3R   | C3S   | C3A     | P3O  | P3G   | M3G    |
| Chokeberry                            |        |       |          |          |         |       |       |         |      |       |        |
| E5                                    | NF     | 9.26  | 25.33    | 0.37     | 1390.42 | 9.30  | 43.30 | 2375.18 | 6.29 | NF    | 0.38   |
| E12                                   | NF     | 9.30  | 24.52    | 0.88     | 1122.84 | 9.00  | 42.37 | 1942.01 | 5.79 | NF    | 0.65   |
| E14                                   | NF     | 7.44  | 20.28    | 0.52     | 993.48  | 7.08  | 38.72 | 1734.30 | 4.72 | NF    | 2.54   |
| E21                                   | NF     | 2.49  | 7.00     | 0.25     | 56.59   | 2.41  | 25.74 | 68.27   | 0.76 | NF    | 0.21   |
| E8                                    | NF     | 5.73  | 8.32     | 0.46     | 440.19  | 5.61  | 33.78 | 905.03  | 2.76 | NF    | 0.48   |
| K1                                    | NF     | 4.67  | 8.73     | 0.53     | 157.07  | 4.50  | 35.70 | 234.75  | 1.93 | NF    | 0.49   |
| Blueberry                             |        |       |          |          |         |       |       |         |      |       |        |
| E5                                    | 743.26 | 0.68  | 0.71     | 18.81    | 18.10   | 0.64  | 0.36  | 53.92   | 0.20 | 16.35 | 917.04 |
| E12                                   | 679.81 | 1.27  | 2.55     | 16.70    | 73.76   | 1.20  | 3.54  | 120.81  | 0.65 | 63.19 | 730.44 |
| E17                                   | 500.92 | 1.61  | 3.14     | 4.59     | 102.61  | 1.45  | 5.23  | 145.37  | 1.17 | 93.97 | 130.60 |
| E29                                   | 198.11 | 0.79  | 1.64     | 2.40     | 34.30   | 0.73  | 1.97  | 44.75   | 0.50 | 33.69 | 46.32  |
| E25                                   | 286.36 | 0.20  | 2.63     | 2.73     | 18.07   | 0.20  | 0.55  | 18.49   | 0.17 | 18.25 | 25.46  |
| K1                                    | 409.47 | 0.60  | 1.17     | 5.13     | 38.50   | 0.60  | 2.16  | 41.98   | 0.42 | 36.12 | 38.19  |
| Black goji berry                      |        |       |          |          |         |       |       |         |      |       |        |
| E5                                    | 19.02  | 13.74 | 1.59     | 4.54     | 2.90    | 13.46 | 0.09  | 1.05    | NF   | 2.89  | 1.88   |
| E11                                   | 25.98  | 16.00 | 1.71     | 5.55     | 3.04    | 15.65 | 0.09  | 0.96    | NF   | 2.95  | 2.60   |
| E15                                   | 164.69 | 15.77 | 2.32     | 4.49     | 10.17   | 15.77 | 2.32  | 9.15    | NF   | 9.96  | 9.02   |
| E21                                   | 22.97  | 10.29 | 1.13     | 3.08     | 2.63    | 10.19 | 0.34  | 1.06    | NF   | 2.68  | 2.15   |
| E34                                   | 36.25  | 16.03 | 1.49     | 4.27     | 3.55    | 16.07 | 0.48  | 1.59    | NF   | 3.39  | 4.32   |
| K1                                    | 30.23  | 17.08 | 1.89     | 5.63     | 3.57    | 16.97 | 0.27  | 0.95    | NF   | 3.46  | 2.96   |

88 \*Abbreviations: D3G- Delphinidin-3-O-glucoside, C3S- Cyanidin-3-O-sophoroside, C3,5-diG- Cyanidin-3,5-di-O-glucoside, M3,5-diG- Malvidin-  
89 3,5-di-O-glucoside, C3G- Cyanidin-3-O-glucoside, C3R- Cyanidin-3-O-rutinoside, C3S- Cyanidin-3-O-sambubioside, C3A- Cyanidin-3-O-  
90 arabinoside, P3O- Pelargonidin-3-O- glucoside, P3G- Peonidin-3-O-glucoside, M3G- Malvidin-3-O-glucoside, NF- not found.

91

92 Table S9. Paired t-test for quantified phenolic compounds in selected extracts.

|                  | <i>t</i> *  | <i>P</i> |
|------------------|-------------|----------|
| Chokeberry       |             |          |
| K1 vs E5         | 1.51        | 0.14     |
| K1 vs E12        | 1.64        | 0.11     |
| K1 vs E14        | 1.61        | 0.12     |
| K1 vs E21        | 0.11        | 0.92     |
| K1 vs E8         | 0.73        | 0.47     |
| Blueberry        |             |          |
| K1 vs E5         | 1.33        | 0.19     |
| K1 vs E12        | 1.89        | 0.07     |
| K1 vs E17        | <b>3.21</b> | 0.003    |
| K1 vs E29        | 0.73        | 0.47     |
| K1 vs E25        | 1.28        | 0.21     |
| Black goji berry |             |          |
| K1 vs E5         | 1.05        | 0.30     |
| K1 vs E11        | 0.21        | 0.83     |
| K1 vs E15        | 0.41        | 0.68     |
| K1 vs E21        | 1.39        | 0.18     |
| K1 vs E34        | 1.14        | 0.26     |

\*tcr=2.05
